# Supplementary material
Source: publisher figshare collection journal article supplement (https://acs.figshare.com/ndownloader/files/5733666)
Supplement: Supplementary file 1 [file 5733666]

## Supporting Information

### Dynamics and Fluidity of Amyloid Fibrils: A Model of Fibrous Protein Aggregates

Ami S. Lakdawala, David M. Morgan, Dennis C. Liotta, David G. Lynn, James P. Snyder

#### Relationship of Peptide Length to Ideal $\beta$ -sheet Geometry

| Residues             | AMBER*<br>$\Delta E^a$ (kcal/mol) | B3LYP/6-31G**<br>$\Delta E^a$ (kcal/mol) |
|----------------------|-----------------------------------|------------------------------------------|
| <sup>16</sup> KL     | 3.95                              | 3.75                                     |
| <sup>16</sup> KLV    | 4.43                              | 4.09                                     |
| <sup>16</sup> KLVF   | 6.96                              | 7.41                                     |
| <sup>16</sup> KLVFF  | 9.48                              | 8.94                                     |
| <sup>16</sup> KLVFFA | 11.29                             | -                                        |

<sup>a</sup>  $\Delta E$  = (constrained geometry) – (unconstrained geometry)

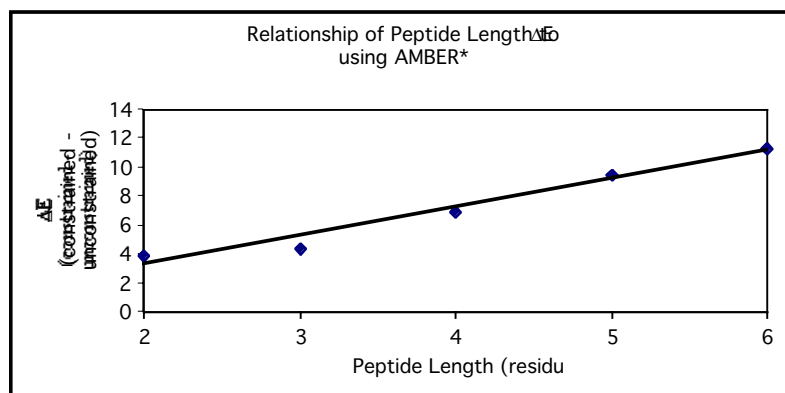

**Figure S1.** Plot of the energy differences between fully optimized peptides and their idealized  $\beta$ -strand geometries ( $\Delta E(\text{constrained-unconstrained})$ ) for the di-, tri-, tetra-, penta- and hexapeptides from KLVFFA; AMBER\*/GBSA/H<sub>2</sub>O force field; Slope = 2.0 kcal/mol.

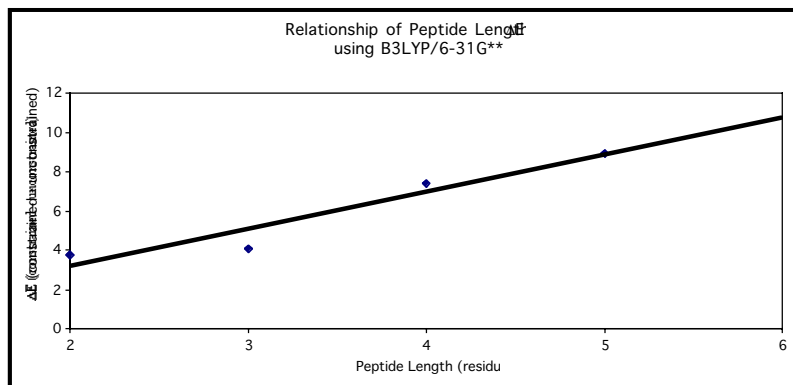

**Figure S2.** Plot of the energy differences between fully optimized peptides and their idealized  $\beta$ -strand geometries ( $\Delta E(\text{constrained-unconstrained})$ ) for the di-, tri-, tetra-, pentapeptides from KLVFFA; B3LYP/6-31G\*\* single point; Slope = 1.9 kcal/mol.
